# Supplementary material
Source: Research Square preprint supplement (doi:10.21203/rs.3.rs-9429892/v1)
Supplement: Supplementary file 1 [file d282e16634a93ddd3e47d6c0.docx]

**Highlights**

- Integrated health-environment policies are critical for sustainable growth
- Emissions-driven growth reflects unsustainable production structures.
- Health investment significantly offsets pollution-driven economic damage.
- Air pollution exerts a robust negative effect on long-run growth.
